# Supplementary material
Source: Springer Nature journal article supplement (https://www.springermedizin.de/resource/supplementary/13613_2011_91_MOESM4_ESM.pdf/12196118)

Cohort level analysis

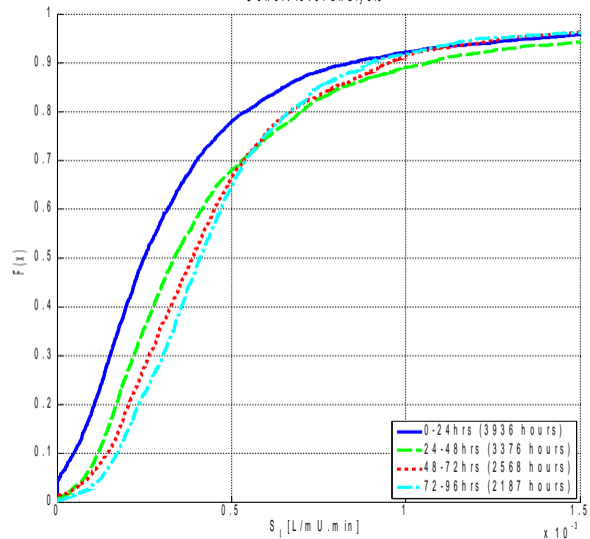

Per-patient level analysis

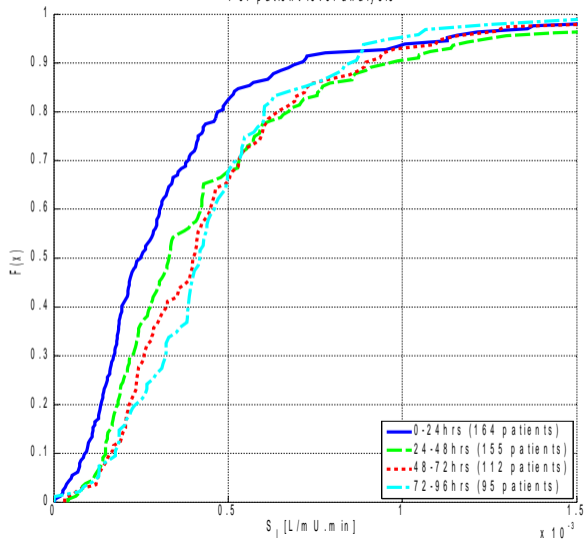

Supplement: MOESM4 [file 12196118]
